# Supplementary material for: Isolation and characterization of highly active keratinolytic microorganisms with promising potential for waste sheep wool processing
Source: Springer Nature journal article supplement (doi:10.1007/s10163-023-01830-5), 2023-11-05
Supplement: MOESM1 [file 26267740]

## Online resource 1

### Article title:

Isolation and characterization of highly active keratinolytic microorganisms with promising potential for waste sheep wool processing

### Journal name:

Journal of Material Cycles and Waste Management

### Authors:

Blaž Petek, Maja Vodusek, Tomaž Accetto, Maša Zorec, Polona Zalar, Jernej Oberčkal, Romana Marinšek Logar\*

### Affiliation of corresponding author:

University of Ljubljana, Biotechnical faculty, Department of Microbiology, Jamnikarjeva 101, 1000 Ljubljana, Slovenia, romana.marinsek@bf.uni-lj.si

List of all isolates identified by whole genome sequencing with corresponding accession numbers from GenBank

| Strain | Identification              | Accession number |
|--------|-----------------------------|------------------|
| RS301  | <i>Bacillus subtilis</i>    | JASDBL000000000  |
| RS304  | <i>Bacillus subtilis</i>    | JASDBM000000000  |
| RS306  | <i>Bacillus subtilis</i>    | JASDBN000000000  |
| RS308  | <i>Bacillus subtilis</i>    | JASDBO00000000   |
| RS309  | <i>Bacillus subtilis</i>    | JASDBP000000000  |
| RS3011 | <i>Bacillus subtilis</i>    | JASDBQ00000000   |
| RS3014 | <i>Bacillus altitudinis</i> | JASDBR000000000  |
| RS3017 | <i>Bacillus subtilis</i>    | JASDBS000000000  |
| RS3021 | <i>Bacillus altitudinis</i> | JASDBT000000000  |
| RS3022 | <i>Bacillus altitudinis</i> | JASDBU000000000  |
| RSRT17 | <i>Bacillus subtilis</i>    | JASDBV000000000  |
|        | <i>Streptomyces</i>         |                  |
| S3018  | <i>coelicoflavus</i>        | JASDBW000000000  |
| S3021  | <i>Bacillus mycoides</i>    | JASDBX000000000  |
| S3027  | <i>Bacillus wiedmannii</i>  | JASDBY000000000  |
| SRT4   | <i>Bacillus wiedmannii</i>  | JASDBZ000000000  |
| WRT10  | <i>Bacillus wiedmannii</i>  | JASDCA000000000  |
