# Supplementary material for: Isolation and characterization of highly active keratinolytic microorganisms with promising potential for waste sheep wool processing
Source: Springer Nature journal article supplement (doi:10.1007/s10163-023-01830-5), 2023-11-05

## **Online resource 2**

### **Article title:**

Isolation and characterization of highly active keratinolytic microorganisms with promising potential for waste sheep wool processing

### **Journal name:**

Journal of Material Cycles and Waste Management

### **Authors:**

Blaž Petek, Maja Vodusek, Tomaž Accetto, Maša Zorec, Polona Zalar, Jernej Oberčkal, Romana Marinšek Logar\*

### **Affiliation of corresponding author**

University of Ljubljana, Biotechnical faculty, Department of Microbiology, Jamnikarjeva 101, 1000 Ljubljana, Slovenia, romana.marinsek@bf.uni-lj.si

Heatmap diagram of Average nucleotide identity metric of isolated strains versus strains of other species which appeared most related upon preliminary analysis using the 16SrRNA gene sequence. 95% (white and red colour) is considered to be the species boundary. A: RS3014; B: S3021; C: RS308; D: S3027; E: S3018.

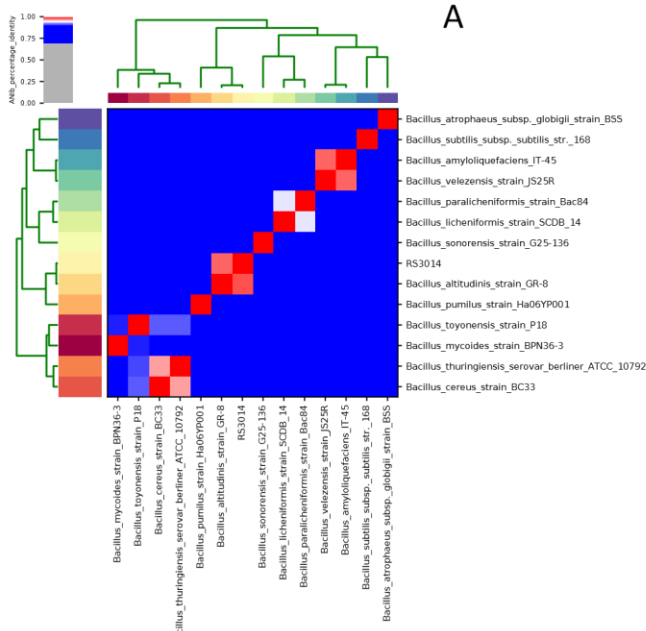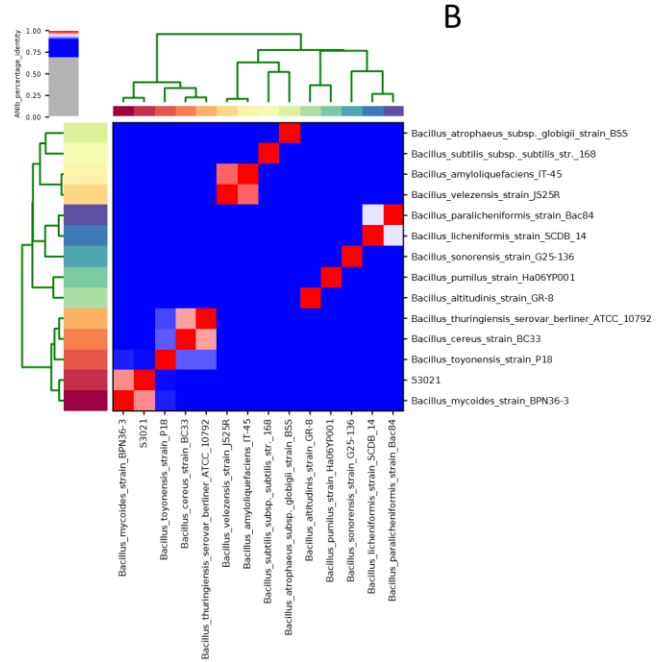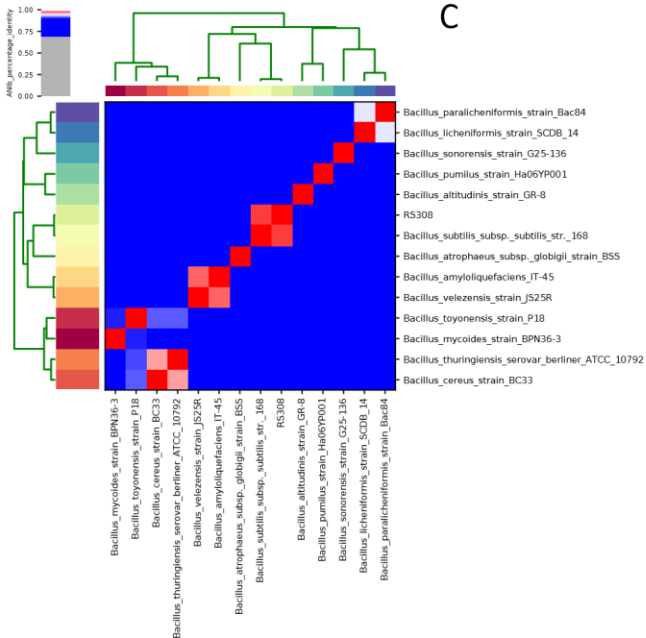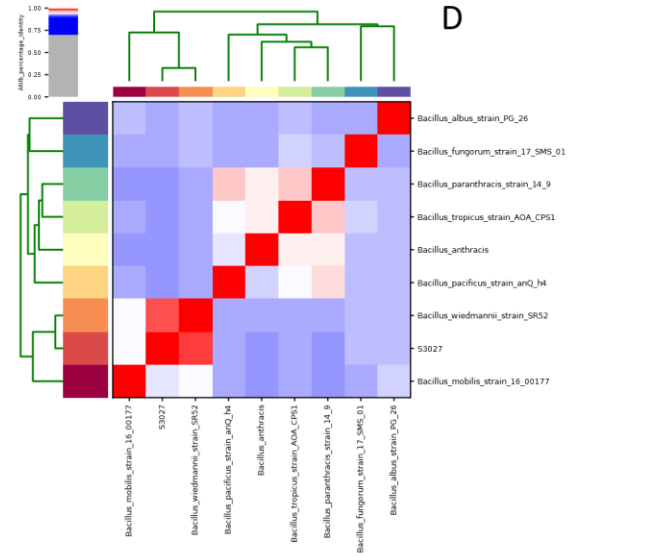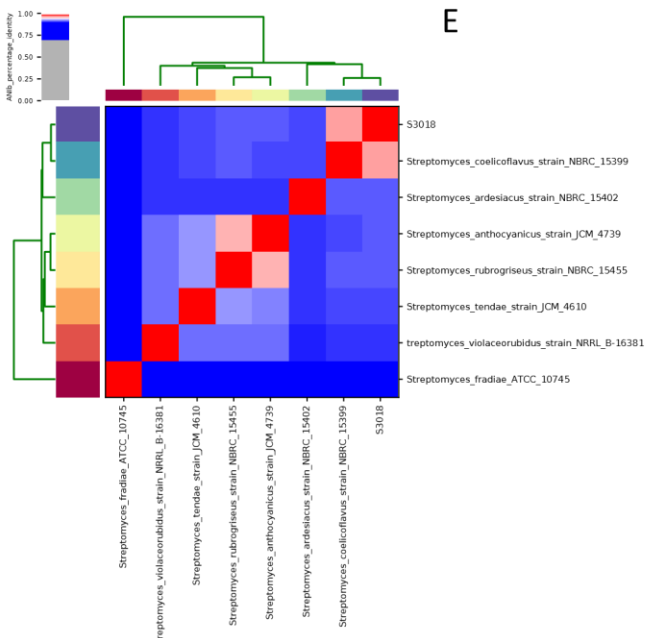

Supplement: MOESM2 [file 26267740]
