# Supplementary material for: Isolation and characterization of highly active keratinolytic microorganisms with promising potential for waste sheep wool processing
Source: Springer Nature journal article supplement (doi:10.1007/s10163-023-01830-5), 2023-11-05

### Online resource 3

#### Article title:

Isolation and characterization of highly active keratinolytic microorganisms with promising potential for waste sheep wool processing

#### Journal name:

Journal of Material Cycles and Waste Management

#### Authors:

Blaž Petek, Maja Vodusek, Tomaž Accetto, Maša Zorec, Polona Zalar, Jernej Oberčkal, Romana

Marinšek Logar\*

#### Affiliation of corresponding author

University of Ljubljana, Biotechnical faculty, Department of Microbiology, Jamnikarjeva 101, 1000 Ljubljana, Slovenia, romana.marinsek@bf.uni-lj.si

Phylogenetic trees for *B. subtilis* group (above) and *B. cereus* group (below) resulting from the core genome analysis using Maximum Likelihood approach with the included type strains *B. altitudinis* 41KF2bT, *B. mycooides* DSM2048, *B. subtilis* DSM10, and *B. wiedmannii* DSM102050

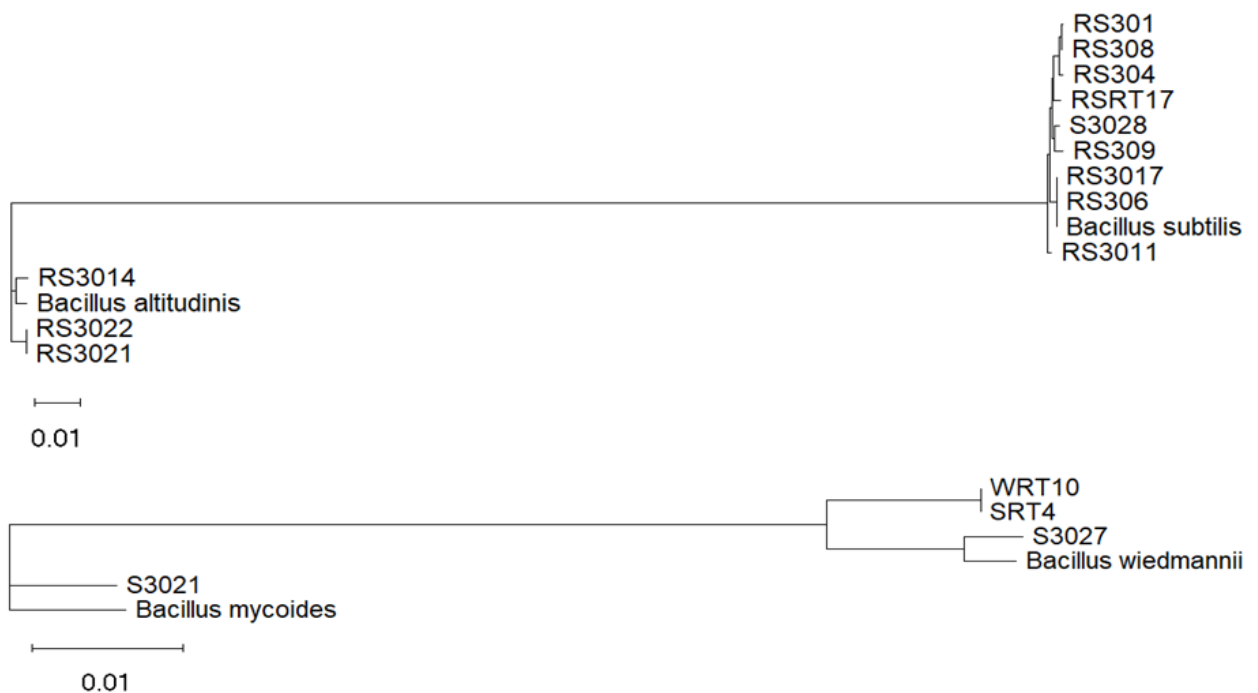

Supplement: MOESM3 [file 26267740]
